# Supplementary material
Source: PubMed Central journal article supplement (PMC3064619)

Supplementary figure: Ideogram of 38 high grade glioma samples. Samples underlined in blue are high grade gliomas and samples underlined in red are DIPG.

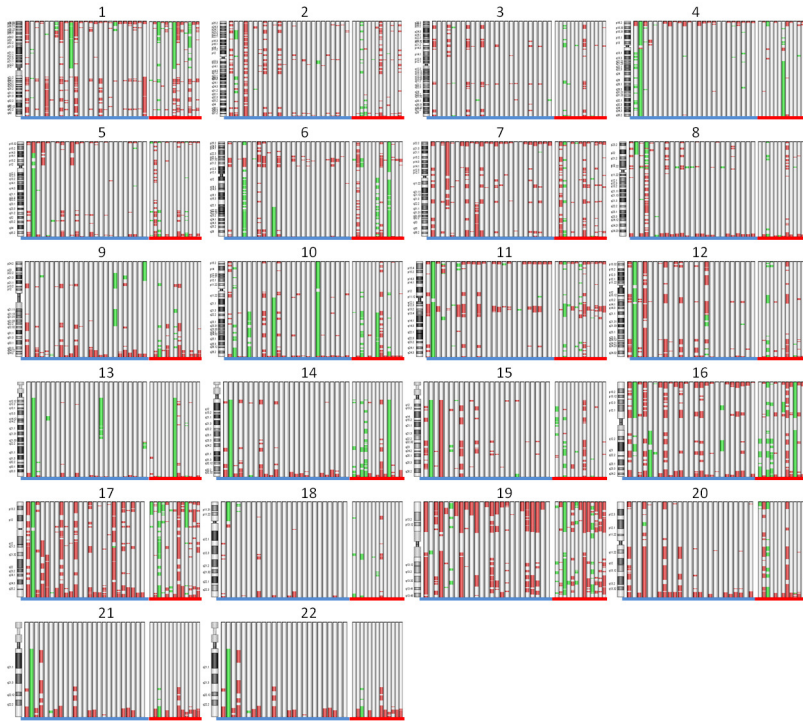

Supplement: supp_noq158_noq158supp1.pdf [file supp_noq158_noq158supp1.pdf]
