# Supplementary material
Source: PubMed Central journal article supplement (PMC3064619)
Supplement: supp_noq158_noq158supp2.pdf [file supp_noq158_noq158supp2.pdf]

Supplementary Data

TMA Samples Database

| Sample | Sex | Age at Diagnosis (years) | Location       | Resection Partial/Complete | Sample taken pre/post treatment | Diagnosis | Treatment | Survival Time (Months) |
|--------|-----|--------------------------|----------------|----------------------------|---------------------------------|-----------|-----------|------------------------|
| 1      | M   | 2.3                      | Parietal lobe  | Subtotal                   | Pre-treatment                   | GBM       | CT        | 3                      |
| 2      |     |                          |                |                            | Pre-treatment                   | GBM       |           |                        |
| 3      | F   | 8.1                      | Frontal lobe   | Subtotal                   |                                 | SC GBM    |           | 3                      |
| 4      | F   | 14.3                     | Parietal lobe  | Subtotal                   | Pre-treatment                   | GBM       | CT+RT     | 20                     |
| 5      | F   | 4.3                      | Temporal lobe  | Complete                   | Pre-treatment                   | GBM       | CT+RT     | 24                     |
| 6      | F   | 9.2                      | Frontal lobe   | Biopsy                     |                                 | GBM       | CT+RT     | 29                     |
| 7      | F   | 4.3                      | Parietal lobe  | Subtotal                   | Pre-treatment                   | GBM       | RT        | 30                     |
| 8      | M   | 1.1                      | Parietal lobe  | Subtotal                   | Pre-treatment                   | GBM       |           |                        |
| 9      | M   | 4.7                      | Occipital lobe | Subtotal                   | Pre-treatment                   | GBM       | CT+RT     | 4                      |
| 10     | M   | 9.3                      | Frontal lobe   | Complete                   | Pre-treatment                   | GBM       | CT+RT     | 29                     |
| 11     | M   |                          |                | Subtotal                   |                                 | GBM       |           |                        |
| 12     | M   | 10.2                     | Temporal lobe  | Complete                   | Pre-treatment                   | GBM       | CT+RT     | 7                      |
| 13     | M   | 2.9                      | Frontal lobe   | Complete                   | Pre-treatment                   | GBM       | CT        | 15                     |
| 14     | F   | 3.6                      | Frontal lobe   | Subtotal                   | Pre-treatment                   | GC GBM    | CT        |                        |
| 15     | M   | 7.3                      | Thalamus       | Subtotal                   | Pre-treatment                   | GBM       | RT        |                        |
| 16     | M   | 9.8                      | Frontal lobe   | Subtotal                   | Pre-treatment                   | GBM       | CT+RT     | 12                     |
| 17     | M   | 6.7                      | Frontal lobe   | Subtotal                   | Pre-                            | AA        | RT        | 7                      |

|    |   |      |                 |          | treatment     |     |       |    |
|----|---|------|-----------------|----------|---------------|-----|-------|----|
| 18 | M | 8.4  | Brain Stem/Pons | Biopsy   | Pre-treatment | GBM |       | 2  |
| 19 | M | 10.9 | Frontal lobe    | Complete | Pre-treatment | GBM | CT+RT | 4  |
| 20 | M |      | Frontal lobe    | Subtotal | Pre-treatment | AA  |       | 3  |
| 21 | M | 4.8  | Brain Stem/Pons | Biopsy   | Pre-treatment | GBM | RT    | 6  |
| 22 | M | 10.1 | Cerebral        | Subtotal | Pre-treatment | GBM | CT+RT |    |
| 23 | M |      |                 |          |               | GBM |       |    |
| 24 | M |      |                 |          |               | GBM |       |    |
| 25 | F | 8.5  | Thalamus        | Biopsy   | Pre-treatment | AA  | CT+RT | 15 |
| 26 | F | 4.5  | Frontal lobe    | Complete | Pre-treatment | GBM | CT+RT | 20 |
| 27 | F |      | Frontal lobe    | Complete |               | GBM |       |    |
| 28 | F | 3.3  | Temporal lobe   | Subtotal | Pre-treatment | HGG |       | 3  |
| 29 | M | 12.3 | Brain Stem/Pons | Biopsy   | Pre-treatment | GBM | RT    | 8  |
| 30 | F | 7.6  | Thalamus        |          | Pre-treatment | AA  |       | 0  |
| 31 | F |      | Parietal lobe   |          | Pre-treatment | GBM |       | 0  |
| 32 | F | 4.3  | Temporal lobe   | Complete | Pre-treatment | GBM | CT+RT | 24 |
| 33 | M | 7.7  | Pineal Gland    | Biopsy   | Pre-treatment | GBM | CT    | 5  |
| 34 | M |      | Pineal Gland    | Subtotal |               | GBM |       |    |
| 35 | M | 12.8 | Thalamus        | Subtotal | Pre-treatment | GBM | CT+RT |    |
| 36 | M |      |                 |          |               | GBM |       |    |
| 37 | M | 7.3  | Brain Stem/Pons | Biopsy   | Pre-treatment | GBM | CT+RT | 10 |
| 38 | M |      | Frontal lobe    | Complete |               | GBM | RT    |    |

|    |   |      |                 |          |                |                               |       |    |
|----|---|------|-----------------|----------|----------------|-------------------------------|-------|----|
| 39 | M |      | Frontal lobe    |          |                | GBM                           |       |    |
| 40 | F |      | Frontal lobe    | Partial  | Pre-treatment  | GC GBM                        |       |    |
| 41 | M | 9.0  | Temporal lobe   | Subtotal | Pre-treatment  | AA                            |       |    |
| 42 | M |      | Temporal lobe   | Complete |                | AA                            | CT    |    |
| 43 | M | 0.1  | Cerebral        | Subtotal | Pre-treatment  | GBM                           |       | 4  |
| 44 | F | 5.6  | Brain Stem/Pons | Biopsy   | Pre-treatment  | GBM                           | CT    | 11 |
| 45 | F | 5.7  | Brain Stem/Pons | Subtotal | Pre-treatment  | GBM                           |       | 5  |
| 46 | M | 14.1 | Cerebral        | Subtotal | Pre-treatment  | GBM                           | RT    |    |
| 47 |   |      | Cerebral        | Subtotal |                | GBM                           | CT    |    |
| 48 | M | 1.0  | Cerebral        | Biopsy   | Pre-treatment  | GBM                           | CT    | 27 |
| 49 | M | 2.4  | Cerebral        | Complete |                | GBM                           | CT    | 10 |
| 50 | M | 2.5  | Cerebral        | Complete |                | GBM                           | CT    | 9  |
| 51 | M | 2.8  | Cerebral        | Complete | Pre-treatment  | AA                            | CT    |    |
| 52 | F | 2.0  | Cerebral        | Subtotal | Pre-treatment  | AA                            | CT    |    |
| 53 | M | 5.8  | Cerebral        | Complete | Pre-treatment  | GBM                           | CT+RT | 5  |
| 54 | M | 5.8  | Cerebral        | Complete | Pre-treatment  | GBM                           | CT+RT | 5  |
| 55 | M | 7.3  | Cerebrum        | Complete | Post-treatment | GB<                           | CT+RT | 6  |
| 56 | M | 3.8  | Cerebral        | Biopsy   | Pre-treatment  | GBM                           | CT    | 5  |
| 57 | M | 4.3  | Brain           | Biopsy   | Pre-treatment  | Gliomatosis cerebri grade III | CT    | 16 |
| 58 | F | 8.1  | Cerebral        |          |                | GBM                           |       |    |
| 59 | M | 13.1 | Cerebral        |          |                | Gliomatosis cerebri grade III |       |    |
| 60 | M | 1.8  | Brain           | Biopsy   | Pre-           | GBM                           | CT    | 3  |

|    |   |      |                        |          | treatment      |                |       |    |
|----|---|------|------------------------|----------|----------------|----------------|-------|----|
| 61 | M | 4.0  | Cerebral               | Subtotal | Pre-treatment  | GBM            | CT    | 3  |
| 62 | M | 0.5  | Cerebral               | Biopsy   | Pre-treatment  | GBM            |       |    |
| 63 | M | 6.5  | Cerebral               | Complete | Post-treatment | GBM            | CT+RT | 12 |
| 64 | F | 12.3 | Brain                  | Biopsy   | Pre-treatment  | AA             | CT+RT |    |
| 65 | F | 16.3 | Brain                  | Biopsy   | Pre-treatment  | GBM            | CT+RT | 15 |
| 66 | F | 14.1 | Cerebral               | Complete | Pre-treatment  | GBM            | CT+RT | 8  |
| 67 | F | 0.7  | Brain stem             | Biopsy   | Pre-treatment  | AA             | CT+RT | 89 |
| 68 | F | 1.2  | Posterior fossa        | Subtotal | Pre-treatment  | GBM            | CT    |    |
| 69 | F | 10.6 | Brain stem             | Biopsy   | Pre-treatment  | AA             | CT+RT | 18 |
| 70 | F | 15.3 |                        |          |                | GBM            |       |    |
| 71 | F | 4.6  |                        | Biopsy   | Pre-treatment  | small cell GBM |       |    |
| 72 | M | 10.1 | Brain                  | Biopsy   | Pre-treatment  | AA             | CT+RT | 10 |
| 73 | M | 4.3  | Spine                  | Complete | Pre-treatment  | GBM            | CT+RT |    |
| 74 | F | 18.8 | Cerebral               | Subtotal | Pre-treatment  | AA             |       |    |
| 75 | M | 0.0  | Brain                  | Biopsy   | Pre-treatment  | AA             | CT    |    |
| 76 | F | 6.7  | Cerebral               | Subtotal | Post-treatment | GBM            | RT    | 24 |
| 77 | M | -    | R occipital lobe       | Subtotal |                | GBM            | CT    |    |
| 78 | M |      | R parietal lobe        | Complete | Pre-treatment  | small cell GBM | RT    |    |
| 79 | F |      | Temporal parietal lobe | Biopsy   | Post-treatment | GBM            | RT    |    |

|    |   |      |                      |          |                |     |        |   |
|----|---|------|----------------------|----------|----------------|-----|--------|---|
| 80 | M | 16.6 | Cerebellum           | Complete | Pre-treatment  | GBM | CT     |   |
| 81 |   | 0.0  |                      |          | Pre-treatment  | GBM |        |   |
| 82 | F |      | Hypothalamic         | Subtotal | Pre-treatment  | GBM | CT     |   |
| 83 | M |      | Brainstem            | Complete | Pre-treatment  | GBM | RT     |   |
| 84 | M |      | Temporal lobe        | Complete | Post-treatment | AA  | CT     |   |
| 85 | M | 6.7  | Frontal lobe         | Subtotal | Pre-treatment  | GBM | RT     | 7 |
| 86 | M |      | Cerebellum           | Biopsy   | Pre-treatment  | AA  | RT     |   |
| 87 | F |      | Thalamus/midbrain    | Biopsy   | Pre-treatment  | AA  | RT     |   |
| 88 | M |      | Spinal cord          | Complete | Pre-treatment  | GBM | RT     |   |
| 89 | M | 10.7 | L Parietal lobe      | Complete | Pre-treatment  | AA  | CT+RT  |   |
| 90 | M |      | Brain stem           | Biopsy   | Pre-treatment  | LGA | -      |   |
| 91 | F |      | Brainstem            | Biopsy   | Pre-treatment  | BSG | CT+RT  |   |
| 92 | M |      | brainstem            | Biopsy   | Pre-treatment  | AO  | -      |   |
| 93 | M |      | Brain stem           | Subtotal | Pre-treatment  | BSG | At LRI |   |
| 94 | M |      | Cerebral             | Subtotal | Pre-treatment  | AA  | CT+RT  |   |
| 95 | F |      | Brain stem           | Biopsy   | Pre-treatment  | BSG |        |   |
| 96 | M |      | Cerebellum/brainstem | Complete | Pre-treatment  | BSG | -      |   |
| 97 | F |      | Brain stem           | Biopsy   | Pre-treatment  | BSG | RT     |   |
| 98 | M |      |                      | Subtotal | Pre-treatment  | BSG | -      |   |

|     |   |      |                             |          | treatment      |                                                |       |     |
|-----|---|------|-----------------------------|----------|----------------|------------------------------------------------|-------|-----|
| 99  | M |      | Cerebral                    | Complete | Pre-treatment  | AA                                             | RT    |     |
| 100 | F |      | Brain stem                  | Biopsy   | Pre-treatment  | LGA                                            | -     |     |
| 101 | M | 0.7  | Brain stem                  |          | Pre-treatment  | BSG                                            | CT    |     |
| 102 | F |      | Brain stem                  | Biopsy   | Pre-treatment  | LGA                                            | CT+RT |     |
| 103 | F |      | Cerebral                    | Complete | Pre-treatment  | AO                                             | CT    |     |
| 104 |   |      |                             | Complete | Post-treatment | LGA                                            | -     |     |
| 105 | M | 7.0  | Cerebral                    | Complete | Pre-treatment  | Anaplastic<br>pleomorphic<br>xantroastrocytoma | RT    |     |
| 106 | F | 14.0 | R Parieto-occipital<br>lobe | Subtotal | Pre-treatment  | AO                                             | CT+RT |     |
| 107 | M | 17.1 | L Basal Ganglia             | Biopsy   | Pre-treatment  | AA                                             | CT    |     |
| 108 | M | 18.9 | R Frontal lobe              | Subtotal | Pre-treatment  | GBM                                            | CT+RT |     |
| 109 | M | 12.0 | L Parietal lobe             | Subtotal | Pre-treatment  | GBM                                            | CT+RT |     |
| 110 | M | 12.5 | Brain stem                  | Biopsy   |                | BSG                                            | -     |     |
| 111 | M | 13.0 | Brain stem                  | Biopsy   | Pre-treatment  | BSG                                            | RT    |     |
| 112 | M | 19.6 | Brain stem                  | Biopsy   | Pre-treatment  | BSG                                            | CT+RT |     |
| 113 | M | 12.6 | Brain<br>stem/cerebellum    | Biopsy   | Pre-treatment  | BSG                                            | CT+RT |     |
| 114 | F | 3.8  | Brain stem                  | Biopsy   | Pre-treatment  | BSG                                            | RT    |     |
| 115 | M | 3.3  | Brain stem                  | Subtotal | Pre-treatment  | BSG                                            | RT    |     |
| 116 | F | 5.8  | Chiasm                      | Subtotal | Pre-treatment  | GBM                                            | CT    | >70 |

|     |   |      |                               |          |                |                         |       |     |
|-----|---|------|-------------------------------|----------|----------------|-------------------------|-------|-----|
| 117 |   | 0.0  |                               |          |                | GBM                     |       |     |
| 118 | M | 2.7  | Frontal lobe                  | Subtotal | Pre-treatment  | AO                      | CT+RT | >46 |
| 119 | M | 0.6  | Frontal lobe                  | Biopsy   | Pre-treatment  | GBM                     | CT    | 1   |
| 120 |   | 0.0  |                               |          |                | Gliomatosis cerebri III |       |     |
| 121 | F | 2.4  | Frontal lobe                  | Subtotal | Pre-treatment  | AA                      | CT    | >88 |
| 122 |   | 0.0  |                               |          |                | AO                      |       |     |
| 123 | M | 16.7 | Parietal lobe                 | Complete | Pre-treatment  | GBM                     | RT    | >34 |
| 124 | M | 5.2  | Suprasellar                   | Biopsy   | Pre-treatment  | AA                      |       |     |
| 125 | F | 5.5  | Suprasellar                   | Complete | Pre-treatment  | AA                      |       |     |
| 126 | M | 10.3 | Frontal lobe                  | Biopsy   | Post-treatment | GBM                     |       |     |
| 127 | M | 17.3 | Frontal lobe                  | Biopsy   | Pre-treatment  | AO                      |       |     |
| 128 | F | 7.3  | Posterior Fossa               | Biopsy   | Pre-treatment  | AO                      |       |     |
| 129 | M | 8.4  | Brain Stem/Pons               | Biopsy   | Pre-treatment  | GBM                     |       | 2   |
| 130 | F | 5.7  | Brain Stem/Pons               | Subtotal | Pre-treatment  | GBM                     |       | 5   |
| 131 | M | 7.3  | Brain Stem/Pons               | Biopsy   | Pre-treatment  | GBM                     | CT+RT | 10  |
| 132 | M | 9.8  | Suprasellar (corpus callosum) | Biopsy   | Pre-treatment  | AA                      | CT    |     |
| 133 | F | 15.7 | Diffuse right frontal lobe    | Biopsy   | Pre-treatment  | AA                      | CT    |     |
| 134 |   | 0.0  |                               |          |                | GBM                     |       |     |
| 135 |   | 0.0  |                               |          | Pre-treatment  | GBM                     |       |     |
| 136 |   | 0.0  |                               |          |                | AO                      |       |     |
| 137 | M | 1.6  | right fronto-temporal         |          | Pre-           | AO                      |       |     |

|     |  |     | lobe |  | treatment      |      |  |  |
|-----|--|-----|------|--|----------------|------|--|--|
| 138 |  | 2.6 |      |  | Post-treatment | AO   |  |  |
| 139 |  | 3.1 |      |  |                | AO   |  |  |
| 140 |  |     |      |  |                | DIPG |  |  |
